# Supplementary material
Source: PubMed Central journal article supplement (PMC4846900)
Supplement: ajtr0008-0506-f7.pdf [file ajtr0008-0506-f7.pdf]

## MiR-541 promotes vascular smooth muscle cells proliferation

**Table S1.** Primer sequence

| Name                              | Sequence (5'-3')                                                         |
|-----------------------------------|--------------------------------------------------------------------------|
| miRNA reverse transcription prime |                                                                          |
| miRNA-541                         | ATGTATGAGTGCAGGTCGGAGGTAT<br>TCTCACTATAAGACTCAGCC                        |
| U6 snRNA                          | AAAATATGGAACGCTTCACGAATTTG                                               |
| Real-time PCR primer sequence     |                                                                          |
| miRNA-541                         | AAGACGTA CT CAGGCCATGTCC<br>GACCCAAATGTCGCAGTCAG                         |
| U6 snRNA                          | CTCGCTTCGGCAGCACATATACT<br>ACGCTTCACGAATTTGCGTGTC                        |
| GAPDH                             | AATGGGCAGCCGTTAGGAAA<br>TGAAGGGGTCATTGATGGCA                             |
| PCNA                              | TCCTTTGGTGGGCACCTAAGACCTG                                                |
| IRF7                              | TGATGGTTGAGGTCGTTCTTGATG<br>ATATCTCACGTGACCGAGGA<br>AGCTGATGGTGCTGGAAGTC |
